# Supplementary material for: Identifying research priorities for effective retention strategies in clinical trials
Source: Springer Nature journal article supplement (doi:10.1186/s13063-017-2132-z), 2017-08-31
Supplement: MOESM2 [file 14960400]

## Survey: Methods to minimise missing data in randomised control trials

**Overview:** This short survey builds on knowledge gained from previous CTU surveys and will contribute towards a wider MRC MRP funded project aiming to identify which strategies and practices used to minimise missing data should be formally evaluated. We will ask about the general approach used within your CTU related to targeting of participants, site staff, and CTU processes in order to reduce missing data.

**Definition of missing data:** Missing data may arise within randomised control trials due to participant loss to follow up, participant withdrawal or the particular outcome was not measured for a participant or the measurement was not included in the analysis.

**Completion:** Please pass this survey onto the person/s within your CTU who have an overview of all your trials. It can be completed within the word document or in a printed paper format, depending on your preference.

**Return to:** [a.kearney@liv.ac.uk](mailto:a.kearney@liv.ac.uk) by Friday 12<sup>th</sup> September.

Paper copies can be posted to: Anna Kearney, Clinical Trials Research Centre, University of Liverpool, Institute of Child Health, Alder Hey Children's NHS Foundation Trust, Liverpool, L12 2AP

Thank you!

### 1. What are your considerations when determining an approach to monitoring missing data?

---

---

---

### 2. Do you usually adjust your sample size calculation for missing outcome data at the design stage?

Yes

If Yes, What level do you generally use? \_\_\_\_\_

Do you provide justification for the level used and if so what informs the level used?

---

---

---

No

### 3. What processes does your CTU usually use to reduce missing data? (Tick all that apply)

- Remote data capture with real time flagging of missing data items sent to local research site
- Central data entry with real time flagging of missing data within the CTU
- Automated alerts to trial coordinator of upcoming follow up visits
- Use of PPI in trial design or to address missing data issues raised within a trial
- Other- Specify \_\_\_\_\_

**4. What problems have you experienced in requesting data on the reason behind a participant’s decision to withdraw from a study? (Tick all that apply)**

- Gaining favourable ethical opinion to ask
- Willingness of site staff to ask
- No problems experienced
- Other- specify \_\_\_\_\_

**5. Which factors should be included when determining the following?(Tick all that apply)**

|                                   | Screening                | Recruitment              | Retention for duration of trial | Resolution of data queries | Availability of primary outcome data | Other (Optional Comments) |
|-----------------------------------|--------------------------|--------------------------|---------------------------------|----------------------------|--------------------------------------|---------------------------|
| Site performance                  | <input type="checkbox"/> | <input type="checkbox"/> | <input type="checkbox"/>        | <input type="checkbox"/>   | <input type="checkbox"/>             |                           |
| Funders assessment of performance | <input type="checkbox"/> | <input type="checkbox"/> | <input type="checkbox"/>        | <input type="checkbox"/>   | <input type="checkbox"/>             |                           |
| Per patient payments for sites    | <input type="checkbox"/> | <input type="checkbox"/> | <input type="checkbox"/>        | <input type="checkbox"/>   | <input type="checkbox"/>             |                           |

**6. Which methods/practices have you used to minimise patient attrition and missing data from retained patients (excluding practices associated with questionnaire design)?**

A list of methods and practices used to minimise missing data has been compiled using Valerie Brueton’s 2014 Cochrane Systematic review of missing data interventions and the results of two recent surveys distributed through the CTU network and the Trial Managers Network.

In the subsequent tables please identify which strategies your CTU has used to minimise attrition or missing data by ticking the shaded box in the first column. If your CTU has used any of the strategies for reasons not associated with missing data, please do not tick the box. For all strategies that you have used to address missing data please complete the subsequent columns: who the strategy is aimed at; how regularly the strategy is used; what it is used to address; if there were implementation problems; why it is/ was used; and whether you have evaluated the effectiveness. There is also space for optional comments if you wish to give additional information on the specifics of the strategy, its implementation or evaluation.

Within the table you will be asked to indicate if you are willing to provide an abstract for any formal or information evaluations of missing data strategies. Feedback from the recent Trial Managers survey suggested that more could be done to share practice and knowledge of successful and unsuccessful missing data interventions. Across CTUs there will be a wealth of knowledge as a result of nested RCT and before/ after comparisons which may not always be published. We would like to create a publically available, searchable website of study abstracts evaluating strategies as a reference point for CTUs.

To avoid delays in returning these survey results, we plan to contact you at a later date to collect short abstracts (approx. 300 words) for any completed or ongoing studies. If you are willing to supply an abstract please tick in the right hand grey box against the relevant strategy and provide a contact email when returning the questionnaire.

**Please complete the tables on the following pages:**

**Strategies used by your CTU to minimise missing data**

**Instructions:** For each strategy used by your CTU to minimise missing data please tick the first column and then answer the questions in subsequent columns. NB. If your CTU has used any of the strategies for reasons not associated with missing data there is no need to tick the box or complete subsequent columns

| Strategy used                                                                             | Aimed at?<br><i>(Tick all that apply)</i> |                          | How regularly is it used? |                          |                          | Used to address?<br><i>(Tick all that apply)</i> |                          | Problems with implementation?<br><i>(Tick all that apply)</i> |                                       |                          |                          |                               |                          | Reason for using?        |                          |                          |                          | Complete, ongoing or planned evaluations?<br><i>(Tick all that apply)</i> |                          |                          | Optional Comments<br><br>Space for you to give additional information on the strategy or its application or evaluation.<br><br>If completing a paper copy please use extra pages as required |                          |                          |                          |                          |                          |                          |                          |  |
|-------------------------------------------------------------------------------------------|-------------------------------------------|--------------------------|---------------------------|--------------------------|--------------------------|--------------------------------------------------|--------------------------|---------------------------------------------------------------|---------------------------------------|--------------------------|--------------------------|-------------------------------|--------------------------|--------------------------|--------------------------|--------------------------|--------------------------|---------------------------------------------------------------------------|--------------------------|--------------------------|----------------------------------------------------------------------------------------------------------------------------------------------------------------------------------------------|--------------------------|--------------------------|--------------------------|--------------------------|--------------------------|--------------------------|--------------------------|--|
|                                                                                           | Participants                              | Sites                    | Would not use again       | Used occasionally        | Used routinely           | Patient attrition                                | Missing data             | None (X)                                                      | Resources - finances & staff time (R) | Sites reluctant (S)      | Patients reluctant (P)   | Not practical in practice (N) | Other (O)                | X                        | R                        | S                        | P                        | N                                                                         | O                        | Logic                    |                                                                                                                                                                                              | Experience               | Best practice            | Other (add in comments)  | Before/after comparison  | Nested RCT               | Willing to send abstract |                          |  |
| <b>Communication Strategies</b>                                                           |                                           |                          |                           |                          |                          |                                                  |                          |                                                               |                                       |                          |                          |                               |                          |                          |                          |                          |                          |                                                                           |                          |                          |                                                                                                                                                                                              |                          |                          |                          |                          |                          |                          |                          |  |
| Trial website                                                                             | <input type="checkbox"/>                  | <input type="checkbox"/> | <input type="checkbox"/>  | <input type="checkbox"/> | <input type="checkbox"/> | <input type="checkbox"/>                         | <input type="checkbox"/> | <input type="checkbox"/>                                      | <input type="checkbox"/>              | <input type="checkbox"/> | <input type="checkbox"/> | <input type="checkbox"/>      | <input type="checkbox"/> | <input type="checkbox"/> | <input type="checkbox"/> | <input type="checkbox"/> | <input type="checkbox"/> | <input type="checkbox"/>                                                  | <input type="checkbox"/> | <input type="checkbox"/> | <input type="checkbox"/>                                                                                                                                                                     | <input type="checkbox"/> | <input type="checkbox"/> | <input type="checkbox"/> | <input type="checkbox"/> | <input type="checkbox"/> | <input type="checkbox"/> |                          |  |
| Newsletters                                                                               | <input type="checkbox"/>                  | <input type="checkbox"/> | <input type="checkbox"/>  | <input type="checkbox"/> | <input type="checkbox"/> | <input type="checkbox"/>                         | <input type="checkbox"/> | <input type="checkbox"/>                                      | <input type="checkbox"/>              | <input type="checkbox"/> | <input type="checkbox"/> | <input type="checkbox"/>      | <input type="checkbox"/> | <input type="checkbox"/> | <input type="checkbox"/> | <input type="checkbox"/> | <input type="checkbox"/> | <input type="checkbox"/>                                                  | <input type="checkbox"/> | <input type="checkbox"/> | <input type="checkbox"/>                                                                                                                                                                     | <input type="checkbox"/> | <input type="checkbox"/> | <input type="checkbox"/> | <input type="checkbox"/> | <input type="checkbox"/> | <input type="checkbox"/> |                          |  |
| Social Media e.g. twitter, facebook, blogs                                                | <input type="checkbox"/>                  | <input type="checkbox"/> | <input type="checkbox"/>  | <input type="checkbox"/> | <input type="checkbox"/> | <input type="checkbox"/>                         | <input type="checkbox"/> | <input type="checkbox"/>                                      | <input type="checkbox"/>              | <input type="checkbox"/> | <input type="checkbox"/> | <input type="checkbox"/>      | <input type="checkbox"/> | <input type="checkbox"/> | <input type="checkbox"/> | <input type="checkbox"/> | <input type="checkbox"/> | <input type="checkbox"/>                                                  | <input type="checkbox"/> | <input type="checkbox"/> | <input type="checkbox"/>                                                                                                                                                                     | <input type="checkbox"/> | <input type="checkbox"/> | <input type="checkbox"/> | <input type="checkbox"/> | <input type="checkbox"/> | <input type="checkbox"/> |                          |  |
| Collecting multiple contact details for the patient e.g. home, work, mobile phone numbers | <input type="checkbox"/>                  | <input type="checkbox"/> | <input type="checkbox"/>  | <input type="checkbox"/> | <input type="checkbox"/> | <input type="checkbox"/>                         | <input type="checkbox"/> | <input type="checkbox"/>                                      | <input type="checkbox"/>              | <input type="checkbox"/> | <input type="checkbox"/> | <input type="checkbox"/>      | <input type="checkbox"/> | <input type="checkbox"/> | <input type="checkbox"/> | <input type="checkbox"/> | <input type="checkbox"/> | <input type="checkbox"/>                                                  | <input type="checkbox"/> | <input type="checkbox"/> | <input type="checkbox"/>                                                                                                                                                                     | <input type="checkbox"/> | <input type="checkbox"/> | <input type="checkbox"/> | <input type="checkbox"/> | <input type="checkbox"/> | <input type="checkbox"/> |                          |  |
| Taking contact details for a friend/family member                                         | <input type="checkbox"/>                  | <input type="checkbox"/> | <input type="checkbox"/>  | <input type="checkbox"/> | <input type="checkbox"/> | <input type="checkbox"/>                         | <input type="checkbox"/> | <input type="checkbox"/>                                      | <input type="checkbox"/>              | <input type="checkbox"/> | <input type="checkbox"/> | <input type="checkbox"/>      | <input type="checkbox"/> | <input type="checkbox"/> | <input type="checkbox"/> | <input type="checkbox"/> | <input type="checkbox"/> | <input type="checkbox"/>                                                  | <input type="checkbox"/> | <input type="checkbox"/> | <input type="checkbox"/>                                                                                                                                                                     | <input type="checkbox"/> | <input type="checkbox"/> | <input type="checkbox"/> | <input type="checkbox"/> | <input type="checkbox"/> | <input type="checkbox"/> |                          |  |
| Free phone no. for updating contact details                                               | <input type="checkbox"/>                  | <input type="checkbox"/> | <input type="checkbox"/>  | <input type="checkbox"/> | <input type="checkbox"/> | <input type="checkbox"/>                         | <input type="checkbox"/> | <input type="checkbox"/>                                      | <input type="checkbox"/>              | <input type="checkbox"/> | <input type="checkbox"/> | <input type="checkbox"/>      | <input type="checkbox"/> | <input type="checkbox"/> | <input type="checkbox"/> | <input type="checkbox"/> | <input type="checkbox"/> | <input type="checkbox"/>                                                  | <input type="checkbox"/> | <input type="checkbox"/> | <input type="checkbox"/>                                                                                                                                                                     | <input type="checkbox"/> | <input type="checkbox"/> | <input type="checkbox"/> | <input type="checkbox"/> | <input type="checkbox"/> | <input type="checkbox"/> |                          |  |
| Contacting patients between trial visits                                                  | <input type="checkbox"/>                  | <input type="checkbox"/> | <input type="checkbox"/>  | <input type="checkbox"/> | <input type="checkbox"/> | <input type="checkbox"/>                         | <input type="checkbox"/> | <input type="checkbox"/>                                      | <input type="checkbox"/>              | <input type="checkbox"/> | <input type="checkbox"/> | <input type="checkbox"/>      | <input type="checkbox"/> | <input type="checkbox"/> | <input type="checkbox"/> | <input type="checkbox"/> | <input type="checkbox"/> | <input type="checkbox"/>                                                  | <input type="checkbox"/> | <input type="checkbox"/> | <input type="checkbox"/>                                                                                                                                                                     | <input type="checkbox"/> | <input type="checkbox"/> | <input type="checkbox"/> | <input type="checkbox"/> | <input type="checkbox"/> | <input type="checkbox"/> |                          |  |
| Christmas and birthday cards                                                              | <input type="checkbox"/>                  | <input type="checkbox"/> | <input type="checkbox"/>  | <input type="checkbox"/> | <input type="checkbox"/> | <input type="checkbox"/>                         | <input type="checkbox"/> | <input type="checkbox"/>                                      | <input type="checkbox"/>              | <input type="checkbox"/> | <input type="checkbox"/> | <input type="checkbox"/>      | <input type="checkbox"/> | <input type="checkbox"/> | <input type="checkbox"/> | <input type="checkbox"/> | <input type="checkbox"/> | <input type="checkbox"/>                                                  | <input type="checkbox"/> | <input type="checkbox"/> | <input type="checkbox"/>                                                                                                                                                                     | <input type="checkbox"/> | <input type="checkbox"/> | <input type="checkbox"/> | <input type="checkbox"/> | <input type="checkbox"/> | <input type="checkbox"/> |                          |  |
| Communication of trial findings/ results                                                  | <input type="checkbox"/>                  | <input type="checkbox"/> | <input type="checkbox"/>  | <input type="checkbox"/> | <input type="checkbox"/> | <input type="checkbox"/>                         | <input type="checkbox"/> | <input type="checkbox"/>                                      | <input type="checkbox"/>              | <input type="checkbox"/> | <input type="checkbox"/> | <input type="checkbox"/>      | <input type="checkbox"/> | <input type="checkbox"/> | <input type="checkbox"/> | <input type="checkbox"/> | <input type="checkbox"/> | <input type="checkbox"/>                                                  | <input type="checkbox"/> | <input type="checkbox"/> | <input type="checkbox"/>                                                                                                                                                                     | <input type="checkbox"/> | <input type="checkbox"/> | <input type="checkbox"/> | <input type="checkbox"/> | <input type="checkbox"/> | <input type="checkbox"/> |                          |  |
| Other, Specify _____                                                                      | <input type="checkbox"/>                  | <input type="checkbox"/> | <input type="checkbox"/>  | <input type="checkbox"/> | <input type="checkbox"/> | <input type="checkbox"/>                         | <input type="checkbox"/> | <input type="checkbox"/>                                      | <input type="checkbox"/>              | <input type="checkbox"/> | <input type="checkbox"/> | <input type="checkbox"/>      | <input type="checkbox"/> | <input type="checkbox"/> | <input type="checkbox"/> | <input type="checkbox"/> | <input type="checkbox"/> | <input type="checkbox"/>                                                  | <input type="checkbox"/> | <input type="checkbox"/> | <input type="checkbox"/>                                                                                                                                                                     | <input type="checkbox"/> | <input type="checkbox"/> | <input type="checkbox"/> | <input type="checkbox"/> | <input type="checkbox"/> | <input type="checkbox"/> |                          |  |
| <b>Reminders</b>                                                                          |                                           |                          |                           |                          |                          |                                                  |                          |                                                               |                                       |                          |                          |                               |                          |                          |                          |                          |                          |                                                                           |                          |                          |                                                                                                                                                                                              |                          |                          |                          |                          |                          |                          |                          |  |
| Telephone reminders                                                                       | <input type="checkbox"/>                  | <input type="checkbox"/> | <input type="checkbox"/>  | <input type="checkbox"/> | <input type="checkbox"/> | <input type="checkbox"/>                         | <input type="checkbox"/> | <input type="checkbox"/>                                      | <input type="checkbox"/>              | <input type="checkbox"/> | <input type="checkbox"/> | <input type="checkbox"/>      | <input type="checkbox"/> | <input type="checkbox"/> | <input type="checkbox"/> | <input type="checkbox"/> | <input type="checkbox"/> | <input type="checkbox"/>                                                  | <input type="checkbox"/> | <input type="checkbox"/> | <input type="checkbox"/>                                                                                                                                                                     | <input type="checkbox"/> | <input type="checkbox"/> | <input type="checkbox"/> | <input type="checkbox"/> | <input type="checkbox"/> | <input type="checkbox"/> | <input type="checkbox"/> |  |
| Postal reminders                                                                          | <input type="checkbox"/>                  | <input type="checkbox"/> | <input type="checkbox"/>  | <input type="checkbox"/> | <input type="checkbox"/> | <input type="checkbox"/>                         | <input type="checkbox"/> | <input type="checkbox"/>                                      | <input type="checkbox"/>              | <input type="checkbox"/> | <input type="checkbox"/> | <input type="checkbox"/>      | <input type="checkbox"/> | <input type="checkbox"/> | <input type="checkbox"/> | <input type="checkbox"/> | <input type="checkbox"/> | <input type="checkbox"/>                                                  | <input type="checkbox"/> | <input type="checkbox"/> | <input type="checkbox"/>                                                                                                                                                                     | <input type="checkbox"/> | <input type="checkbox"/> | <input type="checkbox"/> | <input type="checkbox"/> | <input type="checkbox"/> | <input type="checkbox"/> | <input type="checkbox"/> |  |
| Email reminders                                                                           | <input type="checkbox"/>                  | <input type="checkbox"/> | <input type="checkbox"/>  | <input type="checkbox"/> | <input type="checkbox"/> | <input type="checkbox"/>                         | <input type="checkbox"/> | <input type="checkbox"/>                                      | <input type="checkbox"/>              | <input type="checkbox"/> | <input type="checkbox"/> | <input type="checkbox"/>      | <input type="checkbox"/> | <input type="checkbox"/> | <input type="checkbox"/> | <input type="checkbox"/> | <input type="checkbox"/> | <input type="checkbox"/>                                                  | <input type="checkbox"/> | <input type="checkbox"/> | <input type="checkbox"/>                                                                                                                                                                     | <input type="checkbox"/> | <input type="checkbox"/> | <input type="checkbox"/> | <input type="checkbox"/> | <input type="checkbox"/> | <input type="checkbox"/> | <input type="checkbox"/> |  |
| SMS Text reminders                                                                        | <input type="checkbox"/>                  | <input type="checkbox"/> | <input type="checkbox"/>  | <input type="checkbox"/> | <input type="checkbox"/> | <input type="checkbox"/>                         | <input type="checkbox"/> | <input type="checkbox"/>                                      | <input type="checkbox"/>              | <input type="checkbox"/> | <input type="checkbox"/> | <input type="checkbox"/>      | <input type="checkbox"/> | <input type="checkbox"/> | <input type="checkbox"/> | <input type="checkbox"/> | <input type="checkbox"/> | <input type="checkbox"/>                                                  | <input type="checkbox"/> | <input type="checkbox"/> | <input type="checkbox"/>                                                                                                                                                                     | <input type="checkbox"/> | <input type="checkbox"/> | <input type="checkbox"/> | <input type="checkbox"/> | <input type="checkbox"/> | <input type="checkbox"/> | <input type="checkbox"/> |  |
| Other, Specify _____                                                                      | <input type="checkbox"/>                  | <input type="checkbox"/> | <input type="checkbox"/>  | <input type="checkbox"/> | <input type="checkbox"/> | <input type="checkbox"/>                         | <input type="checkbox"/> | <input type="checkbox"/>                                      | <input type="checkbox"/>              | <input type="checkbox"/> | <input type="checkbox"/> | <input type="checkbox"/>      | <input type="checkbox"/> | <input type="checkbox"/> | <input type="checkbox"/> | <input type="checkbox"/> | <input type="checkbox"/> | <input type="checkbox"/>                                                  | <input type="checkbox"/> | <input type="checkbox"/> | <input type="checkbox"/>                                                                                                                                                                     | <input type="checkbox"/> | <input type="checkbox"/> | <input type="checkbox"/> | <input type="checkbox"/> | <input type="checkbox"/> | <input type="checkbox"/> | <input type="checkbox"/> |  |

**Strategies used by your CTU to minimise missing data**

**Instructions:** For each strategy used by your CTU to minimise missing data please tick the first column and then answer the questions in subsequent columns. NB. If your CTU has used any of the strategies for reasons not associated with missing data there is no need to tick the box or complete subsequent columns

| Strategy used                                                                                    | Aimed at?<br>(Tick all that apply) |                          | How regularly is it used? |                          |                          | Used to address?<br>(Tick all that apply) |                          | Problems with implementation?<br>(Tick all that apply)<br><br>None (X)<br>Resources -finances & staff time (R)<br>Sites reluctant (S)<br>Patients reluctant (P)<br>Not practical in practice (N)<br>Other (O)<br><br>X R S P N O | Reason for using?        |                          |                          |                          | Complete, ongoing or planned evaluations?<br>(Tick all that apply) |                          |                          | Optional Comments<br><br>Space for you to give additional information on the strategy or its application or evaluation.<br><br>If completing a paper copy please use extra pages as required |
|--------------------------------------------------------------------------------------------------|------------------------------------|--------------------------|---------------------------|--------------------------|--------------------------|-------------------------------------------|--------------------------|----------------------------------------------------------------------------------------------------------------------------------------------------------------------------------------------------------------------------------|--------------------------|--------------------------|--------------------------|--------------------------|--------------------------------------------------------------------|--------------------------|--------------------------|----------------------------------------------------------------------------------------------------------------------------------------------------------------------------------------------|
|                                                                                                  | Participants                       | Sites                    | Would not use again       | Used occasionally        | Used routinely           | Patient attrition                         | Missing data             |                                                                                                                                                                                                                                  | Logic                    | Experience               | Best practice            | Other (add in comments)  | Before/after comparison                                            | Nested RCT               | Willing to send abstract |                                                                                                                                                                                              |
| <b>Making participation convenient</b>                                                           |                                    |                          |                           |                          |                          |                                           |                          |                                                                                                                                                                                                                                  |                          |                          |                          |                          |                                                                    |                          |                          |                                                                                                                                                                                              |
| Flexibility in appointment times                                                                 | <input type="checkbox"/>           | <input type="checkbox"/> | <input type="checkbox"/>  | <input type="checkbox"/> | <input type="checkbox"/> | <input type="checkbox"/>                  | <input type="checkbox"/> | <input type="checkbox"/>                                                                                                                                                                                                         | <input type="checkbox"/> | <input type="checkbox"/> | <input type="checkbox"/> | <input type="checkbox"/> | <input type="checkbox"/>                                           | <input type="checkbox"/> | <input type="checkbox"/> |                                                                                                                                                                                              |
| Flexibility in appointment locations                                                             | <input type="checkbox"/>           | <input type="checkbox"/> | <input type="checkbox"/>  | <input type="checkbox"/> | <input type="checkbox"/> | <input type="checkbox"/>                  | <input type="checkbox"/> | <input type="checkbox"/>                                                                                                                                                                                                         | <input type="checkbox"/> | <input type="checkbox"/> | <input type="checkbox"/> | <input type="checkbox"/> | <input type="checkbox"/>                                           | <input type="checkbox"/> | <input type="checkbox"/> |                                                                                                                                                                                              |
| Re-imburement of participant expenses                                                            | <input type="checkbox"/>           | <input type="checkbox"/> | <input type="checkbox"/>  | <input type="checkbox"/> | <input type="checkbox"/> | <input type="checkbox"/>                  | <input type="checkbox"/> | <input type="checkbox"/>                                                                                                                                                                                                         | <input type="checkbox"/> | <input type="checkbox"/> | <input type="checkbox"/> | <input type="checkbox"/> | <input type="checkbox"/>                                           | <input type="checkbox"/> | <input type="checkbox"/> |                                                                                                                                                                                              |
| Case management e.g. helping patients book/ attend appointments, access health info etc.         | <input type="checkbox"/>           | <input type="checkbox"/> | <input type="checkbox"/>  | <input type="checkbox"/> | <input type="checkbox"/> | <input type="checkbox"/>                  | <input type="checkbox"/> | <input type="checkbox"/>                                                                                                                                                                                                         | <input type="checkbox"/> | <input type="checkbox"/> | <input type="checkbox"/> | <input type="checkbox"/> | <input type="checkbox"/>                                           | <input type="checkbox"/> | <input type="checkbox"/> |                                                                                                                                                                                              |
| Crèche service                                                                                   | <input type="checkbox"/>           | <input type="checkbox"/> | <input type="checkbox"/>  | <input type="checkbox"/> | <input type="checkbox"/> | <input type="checkbox"/>                  | <input type="checkbox"/> | <input type="checkbox"/>                                                                                                                                                                                                         | <input type="checkbox"/> | <input type="checkbox"/> | <input type="checkbox"/> | <input type="checkbox"/> | <input type="checkbox"/>                                           | <input type="checkbox"/> | <input type="checkbox"/> |                                                                                                                                                                                              |
| Transport to and from appointments                                                               | <input type="checkbox"/>           | <input type="checkbox"/> | <input type="checkbox"/>  | <input type="checkbox"/> | <input type="checkbox"/> | <input type="checkbox"/>                  | <input type="checkbox"/> | <input type="checkbox"/>                                                                                                                                                                                                         | <input type="checkbox"/> | <input type="checkbox"/> | <input type="checkbox"/> | <input type="checkbox"/> | <input type="checkbox"/>                                           | <input type="checkbox"/> | <input type="checkbox"/> |                                                                                                                                                                                              |
| Other, Specify _____                                                                             | <input type="checkbox"/>           | <input type="checkbox"/> | <input type="checkbox"/>  | <input type="checkbox"/> | <input type="checkbox"/> | <input type="checkbox"/>                  | <input type="checkbox"/> | <input type="checkbox"/>                                                                                                                                                                                                         | <input type="checkbox"/> | <input type="checkbox"/> | <input type="checkbox"/> | <input type="checkbox"/> | <input type="checkbox"/>                                           | <input type="checkbox"/> | <input type="checkbox"/> |                                                                                                                                                                                              |
| <b>Methods to enhance data collection</b>                                                        |                                    |                          |                           |                          |                          |                                           |                          |                                                                                                                                                                                                                                  |                          |                          |                          |                          |                                                                    |                          |                          |                                                                                                                                                                                              |
| Patient diaries                                                                                  | <input type="checkbox"/>           | <input type="checkbox"/> | <input type="checkbox"/>  | <input type="checkbox"/> | <input type="checkbox"/> | <input type="checkbox"/>                  | <input type="checkbox"/> | <input type="checkbox"/>                                                                                                                                                                                                         | <input type="checkbox"/> | <input type="checkbox"/> | <input type="checkbox"/> | <input type="checkbox"/> | <input type="checkbox"/>                                           | <input type="checkbox"/> | <input type="checkbox"/> |                                                                                                                                                                                              |
| Trial identity cards                                                                             | <input type="checkbox"/>           | <input type="checkbox"/> | <input type="checkbox"/>  | <input type="checkbox"/> | <input type="checkbox"/> | <input type="checkbox"/>                  | <input type="checkbox"/> | <input type="checkbox"/>                                                                                                                                                                                                         | <input type="checkbox"/> | <input type="checkbox"/> | <input type="checkbox"/> | <input type="checkbox"/> | <input type="checkbox"/>                                           | <input type="checkbox"/> | <input type="checkbox"/> |                                                                                                                                                                                              |
| Behavioural Motivation session/s for patients                                                    | <input type="checkbox"/>           | <input type="checkbox"/> | <input type="checkbox"/>  | <input type="checkbox"/> | <input type="checkbox"/> | <input type="checkbox"/>                  | <input type="checkbox"/> | <input type="checkbox"/>                                                                                                                                                                                                         | <input type="checkbox"/> | <input type="checkbox"/> | <input type="checkbox"/> | <input type="checkbox"/> | <input type="checkbox"/>                                           | <input type="checkbox"/> | <input type="checkbox"/> |                                                                                                                                                                                              |
| Data collection scheduled with routine care                                                      | <input type="checkbox"/>           | <input type="checkbox"/> | <input type="checkbox"/>  | <input type="checkbox"/> | <input type="checkbox"/> | <input type="checkbox"/>                  | <input type="checkbox"/> | <input type="checkbox"/>                                                                                                                                                                                                         | <input type="checkbox"/> | <input type="checkbox"/> | <input type="checkbox"/> | <input type="checkbox"/> | <input type="checkbox"/>                                           | <input type="checkbox"/> | <input type="checkbox"/> |                                                                                                                                                                                              |
| Patient data entry systems e.g. web data, mobile applications                                    | <input type="checkbox"/>           | <input type="checkbox"/> | <input type="checkbox"/>  | <input type="checkbox"/> | <input type="checkbox"/> | <input type="checkbox"/>                  | <input type="checkbox"/> | <input type="checkbox"/>                                                                                                                                                                                                         | <input type="checkbox"/> | <input type="checkbox"/> | <input type="checkbox"/> | <input type="checkbox"/> | <input type="checkbox"/>                                           | <input type="checkbox"/> | <input type="checkbox"/> |                                                                                                                                                                                              |
| Phone questionnaires                                                                             | <input type="checkbox"/>           | <input type="checkbox"/> | <input type="checkbox"/>  | <input type="checkbox"/> | <input type="checkbox"/> | <input type="checkbox"/>                  | <input type="checkbox"/> | <input type="checkbox"/>                                                                                                                                                                                                         | <input type="checkbox"/> | <input type="checkbox"/> | <input type="checkbox"/> | <input type="checkbox"/> | <input type="checkbox"/>                                           | <input type="checkbox"/> | <input type="checkbox"/> |                                                                                                                                                                                              |
| Contact GPs for missing data /trace patients                                                     | <input type="checkbox"/>           | <input type="checkbox"/> | <input type="checkbox"/>  | <input type="checkbox"/> | <input type="checkbox"/> | <input type="checkbox"/>                  | <input type="checkbox"/> | <input type="checkbox"/>                                                                                                                                                                                                         | <input type="checkbox"/> | <input type="checkbox"/> | <input type="checkbox"/> | <input type="checkbox"/> | <input type="checkbox"/>                                           | <input type="checkbox"/> | <input type="checkbox"/> |                                                                                                                                                                                              |
| Use of routinely collected data- ONS/HES/ISD                                                     | <input type="checkbox"/>           | <input type="checkbox"/> | <input type="checkbox"/>  | <input type="checkbox"/> | <input type="checkbox"/> | <input type="checkbox"/>                  | <input type="checkbox"/> | <input type="checkbox"/>                                                                                                                                                                                                         | <input type="checkbox"/> | <input type="checkbox"/> | <input type="checkbox"/> | <input type="checkbox"/> | <input type="checkbox"/>                                           | <input type="checkbox"/> | <input type="checkbox"/> |                                                                                                                                                                                              |
| Follow up through patient notes only                                                             | <input type="checkbox"/>           | <input type="checkbox"/> | <input type="checkbox"/>  | <input type="checkbox"/> | <input type="checkbox"/> | <input type="checkbox"/>                  | <input type="checkbox"/> | <input type="checkbox"/>                                                                                                                                                                                                         | <input type="checkbox"/> | <input type="checkbox"/> | <input type="checkbox"/> | <input type="checkbox"/> | <input type="checkbox"/>                                           | <input type="checkbox"/> | <input type="checkbox"/> |                                                                                                                                                                                              |
| Only collecting primary outcome for patients who have missing primary and secondary outcome data | <input type="checkbox"/>           | <input type="checkbox"/> | <input type="checkbox"/>  | <input type="checkbox"/> | <input type="checkbox"/> | <input type="checkbox"/>                  | <input type="checkbox"/> | <input type="checkbox"/>                                                                                                                                                                                                         | <input type="checkbox"/> | <input type="checkbox"/> | <input type="checkbox"/> | <input type="checkbox"/> | <input type="checkbox"/>                                           | <input type="checkbox"/> | <input type="checkbox"/> |                                                                                                                                                                                              |
| Other, Specify _____                                                                             | <input type="checkbox"/>           | <input type="checkbox"/> | <input type="checkbox"/>  | <input type="checkbox"/> | <input type="checkbox"/> | <input type="checkbox"/>                  | <input type="checkbox"/> | <input type="checkbox"/>                                                                                                                                                                                                         | <input type="checkbox"/> | <input type="checkbox"/> | <input type="checkbox"/> | <input type="checkbox"/> | <input type="checkbox"/>                                           | <input type="checkbox"/> | <input type="checkbox"/> |                                                                                                                                                                                              |

**Strategies used by your CTU to minimise missing data**

**Instructions:** For each strategy used by your CTU to minimise missing data please tick the first column and then answer the questions in subsequent columns. NB. If your CTU has used any of the strategies for reasons not associated with missing data there is no need to tick the box or complete subsequent columns

| Strategy used                                                                                               | Aimed at?<br><i>(Tick all that apply)</i> |                          | How regularly is it used? |                          |                          | Used to address?<br><i>(Tick all that apply)</i> |                          | Problems with implementation?<br><i>(Tick all that apply)</i> | Reason for using?        |                          |                          |                          | Complete, ongoing or planned evaluations?<br><i>(Tick all that apply)</i> |                          |                          | Optional Comments<br><br>Space for you to give additional information on the strategy or its application or evaluation.<br><br>If completing a paper copy please use extra pages as required |
|-------------------------------------------------------------------------------------------------------------|-------------------------------------------|--------------------------|---------------------------|--------------------------|--------------------------|--------------------------------------------------|--------------------------|---------------------------------------------------------------|--------------------------|--------------------------|--------------------------|--------------------------|---------------------------------------------------------------------------|--------------------------|--------------------------|----------------------------------------------------------------------------------------------------------------------------------------------------------------------------------------------|
|                                                                                                             | Participants                              | Sites                    | Would not use again       | Used occasionally        | Used routinely           | Patient attrition                                | Missing data             |                                                               | Logic                    | Experience               | Best practice            | Other (add in comments)  | Before/after comparison                                                   | Nested RCT               | Willing to send abstract |                                                                                                                                                                                              |
| <b>Incentives</b>                                                                                           |                                           |                          |                           |                          |                          |                                                  |                          | X R S P N O                                                   |                          |                          |                          |                          |                                                                           |                          |                          |                                                                                                                                                                                              |
| Money/gift voucher given to participants for completion of a milestone e.g. clinic attendance /data return  | <input type="checkbox"/>                  | <input type="checkbox"/> | <input type="checkbox"/>  | <input type="checkbox"/> | <input type="checkbox"/> | <input type="checkbox"/>                         | <input type="checkbox"/> | <input type="checkbox"/>                                      | <input type="checkbox"/> | <input type="checkbox"/> | <input type="checkbox"/> | <input type="checkbox"/> | <input type="checkbox"/>                                                  | <input type="checkbox"/> | <input type="checkbox"/> | <input type="checkbox"/>                                                                                                                                                                     |
| Money/gift voucher given to participants regardless of clinic attendance or data return                     | <input type="checkbox"/>                  | <input type="checkbox"/> | <input type="checkbox"/>  | <input type="checkbox"/> | <input type="checkbox"/> | <input type="checkbox"/>                         | <input type="checkbox"/> | <input type="checkbox"/>                                      | <input type="checkbox"/> | <input type="checkbox"/> | <input type="checkbox"/> | <input type="checkbox"/> | <input type="checkbox"/>                                                  | <input type="checkbox"/> | <input type="checkbox"/> | <input type="checkbox"/>                                                                                                                                                                     |
| Prize draw limited to trial participants                                                                    | <input type="checkbox"/>                  | <input type="checkbox"/> | <input type="checkbox"/>  | <input type="checkbox"/> | <input type="checkbox"/> | <input type="checkbox"/>                         | <input type="checkbox"/> | <input type="checkbox"/>                                      | <input type="checkbox"/> | <input type="checkbox"/> | <input type="checkbox"/> | <input type="checkbox"/> | <input type="checkbox"/>                                                  | <input type="checkbox"/> | <input type="checkbox"/> | <input type="checkbox"/>                                                                                                                                                                     |
| Charity donation                                                                                            | <input type="checkbox"/>                  | <input type="checkbox"/> | <input type="checkbox"/>  | <input type="checkbox"/> | <input type="checkbox"/> | <input type="checkbox"/>                         | <input type="checkbox"/> | <input type="checkbox"/>                                      | <input type="checkbox"/> | <input type="checkbox"/> | <input type="checkbox"/> | <input type="checkbox"/> | <input type="checkbox"/>                                                  | <input type="checkbox"/> | <input type="checkbox"/> | <input type="checkbox"/>                                                                                                                                                                     |
| Gift e.g. mug, pen, toy                                                                                     | <input type="checkbox"/>                  | <input type="checkbox"/> | <input type="checkbox"/>  | <input type="checkbox"/> | <input type="checkbox"/> | <input type="checkbox"/>                         | <input type="checkbox"/> | <input type="checkbox"/>                                      | <input type="checkbox"/> | <input type="checkbox"/> | <input type="checkbox"/> | <input type="checkbox"/> | <input type="checkbox"/>                                                  | <input type="checkbox"/> | <input type="checkbox"/> | <input type="checkbox"/>                                                                                                                                                                     |
| National Lottery ticket or similar public draw                                                              | <input type="checkbox"/>                  | <input type="checkbox"/> | <input type="checkbox"/>  | <input type="checkbox"/> | <input type="checkbox"/> | <input type="checkbox"/>                         | <input type="checkbox"/> | <input type="checkbox"/>                                      | <input type="checkbox"/> | <input type="checkbox"/> | <input type="checkbox"/> | <input type="checkbox"/> | <input type="checkbox"/>                                                  | <input type="checkbox"/> | <input type="checkbox"/> | <input type="checkbox"/>                                                                                                                                                                     |
| Trial certificate                                                                                           | <input type="checkbox"/>                  | <input type="checkbox"/> | <input type="checkbox"/>  | <input type="checkbox"/> | <input type="checkbox"/> | <input type="checkbox"/>                         | <input type="checkbox"/> | <input type="checkbox"/>                                      | <input type="checkbox"/> | <input type="checkbox"/> | <input type="checkbox"/> | <input type="checkbox"/> | <input type="checkbox"/>                                                  | <input type="checkbox"/> | <input type="checkbox"/> | <input type="checkbox"/>                                                                                                                                                                     |
| Other, Specify _____                                                                                        | <input type="checkbox"/>                  | <input type="checkbox"/> | <input type="checkbox"/>  | <input type="checkbox"/> | <input type="checkbox"/> | <input type="checkbox"/>                         | <input type="checkbox"/> | <input type="checkbox"/>                                      | <input type="checkbox"/> | <input type="checkbox"/> | <input type="checkbox"/> | <input type="checkbox"/> | <input type="checkbox"/>                                                  | <input type="checkbox"/> | <input type="checkbox"/> | <input type="checkbox"/>                                                                                                                                                                     |
| <b>Working with clinical staff at sites</b>                                                                 |                                           |                          |                           |                          |                          |                                                  |                          |                                                               |                          |                          |                          |                          |                                                                           |                          |                          |                                                                                                                                                                                              |
| ONS flagging of trial participants                                                                          | <input type="checkbox"/>                  | <input type="checkbox"/> | <input type="checkbox"/>  | <input type="checkbox"/> | <input type="checkbox"/> | <input type="checkbox"/>                         | <input type="checkbox"/> | <input type="checkbox"/>                                      | <input type="checkbox"/> | <input type="checkbox"/> | <input type="checkbox"/> | <input type="checkbox"/> | <input type="checkbox"/>                                                  | <input type="checkbox"/> | <input type="checkbox"/> | <input type="checkbox"/>                                                                                                                                                                     |
| Site initiation training on missing data                                                                    | <input type="checkbox"/>                  | <input type="checkbox"/> | <input type="checkbox"/>  | <input type="checkbox"/> | <input type="checkbox"/> | <input type="checkbox"/>                         | <input type="checkbox"/> | <input type="checkbox"/>                                      | <input type="checkbox"/> | <input type="checkbox"/> | <input type="checkbox"/> | <input type="checkbox"/> | <input type="checkbox"/>                                                  | <input type="checkbox"/> | <input type="checkbox"/> | <input type="checkbox"/>                                                                                                                                                                     |
| Triggered site training on missing data                                                                     | <input type="checkbox"/>                  | <input type="checkbox"/> | <input type="checkbox"/>  | <input type="checkbox"/> | <input type="checkbox"/> | <input type="checkbox"/>                         | <input type="checkbox"/> | <input type="checkbox"/>                                      | <input type="checkbox"/> | <input type="checkbox"/> | <input type="checkbox"/> | <input type="checkbox"/> | <input type="checkbox"/>                                                  | <input type="checkbox"/> | <input type="checkbox"/> | <input type="checkbox"/>                                                                                                                                                                     |
| Staggered per patient payments to sites                                                                     | <input type="checkbox"/>                  | <input type="checkbox"/> | <input type="checkbox"/>  | <input type="checkbox"/> | <input type="checkbox"/> | <input type="checkbox"/>                         | <input type="checkbox"/> | <input type="checkbox"/>                                      | <input type="checkbox"/> | <input type="checkbox"/> | <input type="checkbox"/> | <input type="checkbox"/> | <input type="checkbox"/>                                                  | <input type="checkbox"/> | <input type="checkbox"/> | <input type="checkbox"/>                                                                                                                                                                     |
| Targeted recruitment of sites/ GPs                                                                          | <input type="checkbox"/>                  | <input type="checkbox"/> | <input type="checkbox"/>  | <input type="checkbox"/> | <input type="checkbox"/> | <input type="checkbox"/>                         | <input type="checkbox"/> | <input type="checkbox"/>                                      | <input type="checkbox"/> | <input type="checkbox"/> | <input type="checkbox"/> | <input type="checkbox"/> | <input type="checkbox"/>                                                  | <input type="checkbox"/> | <input type="checkbox"/> | <input type="checkbox"/>                                                                                                                                                                     |
| Investigator meetings face to face                                                                          | <input type="checkbox"/>                  | <input type="checkbox"/> | <input type="checkbox"/>  | <input type="checkbox"/> | <input type="checkbox"/> | <input type="checkbox"/>                         | <input type="checkbox"/> | <input type="checkbox"/>                                      | <input type="checkbox"/> | <input type="checkbox"/> | <input type="checkbox"/> | <input type="checkbox"/> | <input type="checkbox"/>                                                  | <input type="checkbox"/> | <input type="checkbox"/> | <input type="checkbox"/>                                                                                                                                                                     |
| Investigator teleconferences                                                                                | <input type="checkbox"/>                  | <input type="checkbox"/> | <input type="checkbox"/>  | <input type="checkbox"/> | <input type="checkbox"/> | <input type="checkbox"/>                         | <input type="checkbox"/> | <input type="checkbox"/>                                      | <input type="checkbox"/> | <input type="checkbox"/> | <input type="checkbox"/> | <input type="checkbox"/> | <input type="checkbox"/>                                                  | <input type="checkbox"/> | <input type="checkbox"/> | <input type="checkbox"/>                                                                                                                                                                     |
| Routine site visits by CTU staff                                                                            | <input type="checkbox"/>                  | <input type="checkbox"/> | <input type="checkbox"/>  | <input type="checkbox"/> | <input type="checkbox"/> | <input type="checkbox"/>                         | <input type="checkbox"/> | <input type="checkbox"/>                                      | <input type="checkbox"/> | <input type="checkbox"/> | <input type="checkbox"/> | <input type="checkbox"/> | <input type="checkbox"/>                                                  | <input type="checkbox"/> | <input type="checkbox"/> | <input type="checkbox"/>                                                                                                                                                                     |
| A timeline of participant visits to help sites remember when visits occur and what data should be collected | <input type="checkbox"/>                  | <input type="checkbox"/> | <input type="checkbox"/>  | <input type="checkbox"/> | <input type="checkbox"/> | <input type="checkbox"/>                         | <input type="checkbox"/> | <input type="checkbox"/>                                      | <input type="checkbox"/> | <input type="checkbox"/> | <input type="checkbox"/> | <input type="checkbox"/> | <input type="checkbox"/>                                                  | <input type="checkbox"/> | <input type="checkbox"/> | <input type="checkbox"/>                                                                                                                                                                     |
| Other, Specify _____                                                                                        | <input type="checkbox"/>                  | <input type="checkbox"/> | <input type="checkbox"/>  | <input type="checkbox"/> | <input type="checkbox"/> | <input type="checkbox"/>                         | <input type="checkbox"/> | <input type="checkbox"/>                                      | <input type="checkbox"/> | <input type="checkbox"/> | <input type="checkbox"/> | <input type="checkbox"/> | <input type="checkbox"/>                                                  | <input type="checkbox"/> | <input type="checkbox"/> | <input type="checkbox"/>                                                                                                                                                                     |

### 7. Which questionnaire design/delivery features have you used to minimise missing data?

Please tick which strategies you have used to minimise missing data. For all strategies that you have used please complete the subsequent columns: how regularly the strategy is used; what it is used to address; any problems with implementation; reason for using; and any evaluations of the effectiveness of the strategy.

| Strategy used                                                                                          | How regularly is it used? |                          |                          | Used to address?<br>(Tick all that apply) |                          | Problems with implementation?<br>(Tick all that apply)<br><br>None (X)<br>Resources -finances & staff time (R)<br>Sites reluctant (S)<br>Patients reluctant (P)<br>Not practical in practice (N)<br>Other (O)<br><br><b>X R S P N O</b> | Reason for using?        |                          |                          |                          | Complete, ongoing or planned evaluations?<br>(Tick all that apply) |                          |                          | Optional Comments<br><br>Space for you to give additional information on the strategy or its application or evaluation.<br><br>If completing a paper copy please use extra pages as required |
|--------------------------------------------------------------------------------------------------------|---------------------------|--------------------------|--------------------------|-------------------------------------------|--------------------------|-----------------------------------------------------------------------------------------------------------------------------------------------------------------------------------------------------------------------------------------|--------------------------|--------------------------|--------------------------|--------------------------|--------------------------------------------------------------------|--------------------------|--------------------------|----------------------------------------------------------------------------------------------------------------------------------------------------------------------------------------------|
|                                                                                                        | Would not use again       | Used occasionally        | Used routinely           | Patient attrition                         | Missing data             |                                                                                                                                                                                                                                         | Logic                    | Experience               | Best practice            | Other (add in comments)  | Before/after comparison                                            | Nested RCT               | Willing to send abstract |                                                                                                                                                                                              |
| <b>Incentives</b>                                                                                      |                           |                          |                          |                                           |                          |                                                                                                                                                                                                                                         |                          |                          |                          |                          |                                                                    |                          |                          |                                                                                                                                                                                              |
| Enhanced cover letter                                                                                  | <input type="checkbox"/>  | <input type="checkbox"/> | <input type="checkbox"/> | <input type="checkbox"/>                  | <input type="checkbox"/> | <input type="checkbox"/>                                                                                                                                                                                                                | <input type="checkbox"/> | <input type="checkbox"/> | <input type="checkbox"/> | <input type="checkbox"/> | <input type="checkbox"/>                                           | <input type="checkbox"/> | <input type="checkbox"/> |                                                                                                                                                                                              |
| Total Design method (cover letter, return envelope, postcard reminders and replacement questionnaire)* | <input type="checkbox"/>  | <input type="checkbox"/> | <input type="checkbox"/> | <input type="checkbox"/>                  | <input type="checkbox"/> | <input type="checkbox"/>                                                                                                                                                                                                                | <input type="checkbox"/> | <input type="checkbox"/> | <input type="checkbox"/> | <input type="checkbox"/> | <input type="checkbox"/>                                           | <input type="checkbox"/> | <input type="checkbox"/> |                                                                                                                                                                                              |
| Priority or recorded post                                                                              | <input type="checkbox"/>  | <input type="checkbox"/> | <input type="checkbox"/> | <input type="checkbox"/>                  | <input type="checkbox"/> | <input type="checkbox"/>                                                                                                                                                                                                                | <input type="checkbox"/> | <input type="checkbox"/> | <input type="checkbox"/> | <input type="checkbox"/> | <input type="checkbox"/>                                           | <input type="checkbox"/> | <input type="checkbox"/> |                                                                                                                                                                                              |
| 'Personal touch' e.g. handwritten envelope                                                             | <input type="checkbox"/>  | <input type="checkbox"/> | <input type="checkbox"/> | <input type="checkbox"/>                  | <input type="checkbox"/> | <input type="checkbox"/>                                                                                                                                                                                                                | <input type="checkbox"/> | <input type="checkbox"/> | <input type="checkbox"/> | <input type="checkbox"/> | <input type="checkbox"/>                                           | <input type="checkbox"/> | <input type="checkbox"/> |                                                                                                                                                                                              |
| Inclusion of prepaid envelope                                                                          | <input type="checkbox"/>  | <input type="checkbox"/> | <input type="checkbox"/> | <input type="checkbox"/>                  | <input type="checkbox"/> | <input type="checkbox"/>                                                                                                                                                                                                                | <input type="checkbox"/> | <input type="checkbox"/> | <input type="checkbox"/> | <input type="checkbox"/> | <input type="checkbox"/>                                           | <input type="checkbox"/> | <input type="checkbox"/> |                                                                                                                                                                                              |
| Short questionnaire                                                                                    | <input type="checkbox"/>  | <input type="checkbox"/> | <input type="checkbox"/> | <input type="checkbox"/>                  | <input type="checkbox"/> | <input type="checkbox"/>                                                                                                                                                                                                                | <input type="checkbox"/> | <input type="checkbox"/> | <input type="checkbox"/> | <input type="checkbox"/> | <input type="checkbox"/>                                           | <input type="checkbox"/> | <input type="checkbox"/> |                                                                                                                                                                                              |
| Long but clear questionnaire                                                                           | <input type="checkbox"/>  | <input type="checkbox"/> | <input type="checkbox"/> | <input type="checkbox"/>                  | <input type="checkbox"/> | <input type="checkbox"/>                                                                                                                                                                                                                | <input type="checkbox"/> | <input type="checkbox"/> | <input type="checkbox"/> | <input type="checkbox"/> | <input type="checkbox"/>                                           | <input type="checkbox"/> | <input type="checkbox"/> |                                                                                                                                                                                              |
| Medical questions first                                                                                | <input type="checkbox"/>  | <input type="checkbox"/> | <input type="checkbox"/> | <input type="checkbox"/>                  | <input type="checkbox"/> | <input type="checkbox"/>                                                                                                                                                                                                                | <input type="checkbox"/> | <input type="checkbox"/> | <input type="checkbox"/> | <input type="checkbox"/> | <input type="checkbox"/>                                           | <input type="checkbox"/> | <input type="checkbox"/> |                                                                                                                                                                                              |
| Generic questions first                                                                                | <input type="checkbox"/>  | <input type="checkbox"/> | <input type="checkbox"/> | <input type="checkbox"/>                  | <input type="checkbox"/> | <input type="checkbox"/>                                                                                                                                                                                                                | <input type="checkbox"/> | <input type="checkbox"/> | <input type="checkbox"/> | <input type="checkbox"/> | <input type="checkbox"/>                                           | <input type="checkbox"/> | <input type="checkbox"/> |                                                                                                                                                                                              |
| Questions about the health issue first e.g. mental health before alcohol consumption                   | <input type="checkbox"/>  | <input type="checkbox"/> | <input type="checkbox"/> | <input type="checkbox"/>                  | <input type="checkbox"/> | <input type="checkbox"/>                                                                                                                                                                                                                | <input type="checkbox"/> | <input type="checkbox"/> | <input type="checkbox"/> | <input type="checkbox"/> | <input type="checkbox"/>                                           | <input type="checkbox"/> | <input type="checkbox"/> |                                                                                                                                                                                              |
| Questionnaires sent <3 weeks after a visit                                                             | <input type="checkbox"/>  | <input type="checkbox"/> | <input type="checkbox"/> | <input type="checkbox"/>                  | <input type="checkbox"/> | <input type="checkbox"/>                                                                                                                                                                                                                | <input type="checkbox"/> | <input type="checkbox"/> | <input type="checkbox"/> | <input type="checkbox"/> | <input type="checkbox"/>                                           | <input type="checkbox"/> | <input type="checkbox"/> |                                                                                                                                                                                              |
| Questionnaires sent before clinic visit                                                                | <input type="checkbox"/>  | <input type="checkbox"/> | <input type="checkbox"/> | <input type="checkbox"/>                  | <input type="checkbox"/> | <input type="checkbox"/>                                                                                                                                                                                                                | <input type="checkbox"/> | <input type="checkbox"/> | <input type="checkbox"/> | <input type="checkbox"/> | <input type="checkbox"/>                                           | <input type="checkbox"/> | <input type="checkbox"/> |                                                                                                                                                                                              |
| Questionnaires completed in clinics                                                                    | <input type="checkbox"/>  | <input type="checkbox"/> | <input type="checkbox"/> | <input type="checkbox"/>                  | <input type="checkbox"/> | <input type="checkbox"/>                                                                                                                                                                                                                | <input type="checkbox"/> | <input type="checkbox"/> | <input type="checkbox"/> | <input type="checkbox"/> | <input type="checkbox"/>                                           | <input type="checkbox"/> | <input type="checkbox"/> |                                                                                                                                                                                              |
| Minimising frequency of questionnaires                                                                 | <input type="checkbox"/>  | <input type="checkbox"/> | <input type="checkbox"/> | <input type="checkbox"/>                  | <input type="checkbox"/> | <input type="checkbox"/>                                                                                                                                                                                                                | <input type="checkbox"/> | <input type="checkbox"/> | <input type="checkbox"/> | <input type="checkbox"/> | <input type="checkbox"/>                                           | <input type="checkbox"/> | <input type="checkbox"/> |                                                                                                                                                                                              |
| Other, Specify _____                                                                                   | <input type="checkbox"/>  | <input type="checkbox"/> | <input type="checkbox"/> | <input type="checkbox"/>                  | <input type="checkbox"/> | <input type="checkbox"/>                                                                                                                                                                                                                | <input type="checkbox"/> | <input type="checkbox"/> | <input type="checkbox"/> | <input type="checkbox"/> | <input type="checkbox"/>                                           | <input type="checkbox"/> | <input type="checkbox"/> |                                                                                                                                                                                              |

\* Dillman, Don A. *Mail and telephone surveys*. Vol. 3. Wiley Interscience, 1978.
